# Supplementary material for: Serum magnesium levels in relation to metabolic syndrome: A national population-based cross-sectional study from Jordan
Source: Research Square preprint supplement (doi:10.21203/rs.3.rs-543476/v1), 2021-05-26
Supplement: Supplementary file 1 [file dd800ebf64671683909bebab.docx]

**Authors’ names:**

Nuha Shugaa Addin,1 Anwar Batieha,1 Yousef Khader,1 Hashim Jaddou1, Mohammed El-Khateeb,2 and Kamel Ajlouni2

1 Department of Community Medicine, Public Health and Family Medicine, Faculty of Medicine,

Jordan University of Science & Technology, Irbid 22110, Jordan

2 National Center for Diabetes, Endocrinology and Genetics, P.O. Box 13165, Amman 11942, Jordan

Correspondence should be addressed to Nuha Shugaa Addin, [dr.nuha.dn@gmail.com](mailto:dr.nuha.dn@gmail.com)
